# Supplementary material for: Emerging investigator series: significantly enhanced uptake of Eu3+ on a nanoporous zeolitic mineral in the presence of UO22+: insights into the impact of cation–cation interaction on the geochemical behavior of lanthanides and actinides
Source: Royal Society of Chemistry journal article supplement (doi:10.1039/c8en01396a), 2019-01-01
Supplement: c8en01396a1.pdf [file c8en01396a1.pdf]

*Supporting information*

**Significantly enhanced uptake of  $\text{Eu}^{3+}$  on a nanoporous zeolitic mineral in the presence of  $\text{UO}_2^{2+}$ : Insights into the impact of cation-cation interaction on the geochemical behavior of lanthanides and actinides**

Yaorui Li <sup>a,c</sup>, Lin Xu <sup>b</sup>, Pu Bai <sup>a</sup>, Guangyuan Rong <sup>a</sup>, Duo Zhang <sup>b</sup>, Juan Diwu <sup>b,\*</sup>, Wenfu Yan <sup>a,\*</sup>, Zhifang Chai <sup>b</sup>, Shuao Wang <sup>b,\*</sup>

<sup>a</sup> *State Key Laboratory of Inorganic Synthesis and Preparative Chemistry, College of Chemistry, Jilin University, 2699 Qianjin Street, Changchun 130012, P.R. China*

<sup>b</sup> *State Key Laboratory of Radiation Medicine and Protection, School for Radiological and interdisciplinary Sciences (RAD-X) and Collaborative Innovation Center of Radiation Medicine of Jiangsu Higher Education Institutions, Soochow University, Suzhou 215123, China*

<sup>c</sup> *College of Nuclear Science and Technology, Harbin Engineering University, 145 Nantong Street, Harbin 150001, P.R. China*

Supporting information with 5 Pages, 1 table and 5 Figures.

More physicochemical characteristics of clinoptilolite used in the experiments, such as BET surface area, isoelectric point and stability of clinoptilolite at low pH, were measured actually. The specific surface area of clinoptilolite can't be measured by liquid nitrogen because of the "breathing motions" of zeolite lattices. The fluctuating sizes of ten-member-ring and eight-member-ring channels of clinoptilolite are too small for N<sub>2</sub> molecule to enter into due to weak vibrations of atoms at low temperature. At room temperature, N<sub>2</sub> molecule is able to enter into channels because of larger fluctuating size of clinoptilolite channels. Furthermore, we tried to measure the isoelectric point of clinoptilolite. It is shown that clinoptilolite exhibits a negative charge on surface and can maintain this character even at pH 2. This negative charge results from the substitution of Si<sup>4+</sup> by Al<sup>3+</sup> within the framework. This reveals that clinoptilolite has no isoelectric point in the pH range of 2-12, as we call this type of material "anionic framework" with cation-exchange capabilities. Furthermore, synthetic clinoptilolite have a very good stability at low pH value. The framework of synthetic clinoptilolite will remain stable in solution of HCl with a concentration of 1 M.

Eu and U *L*<sub>III</sub>-edge EXAFS spectra were obtained at Shanghai Synchrotron Radiation Facility (SSRF, Shanghai, China) which is an advanced third generation light sources with high flux. The sample cell was enclosed in a self-made Ziploc bag, and Eu and U fluorescence response was measure with Lytle detector through which a constant flow of argon was maintained throughout the course of the experiments. Eu and U *L*<sub>III</sub>-edge (Eu, 6976.9 eV; U, 17167 eV) EXAFS spectra were collected at 298 K with the measurement parameters which were shown in the table below.

Table S1. The parameters of EXAFS measurement.

| Energy (eV)       | -200 to -20 | -20 to 30 | 30 to 150 | 150 to 300 | 300 to 450 | 450 to 600 |
|-------------------|-------------|-----------|-----------|------------|------------|------------|
| Steps (eV)        | 1           | 0.5       | 1         | 2          | 3          | 4          |
| Integral time (s) | 5           | 5         | 5         | 5          | 5          | 5          |

"-" represents pre-edge; the positive represents post-edge

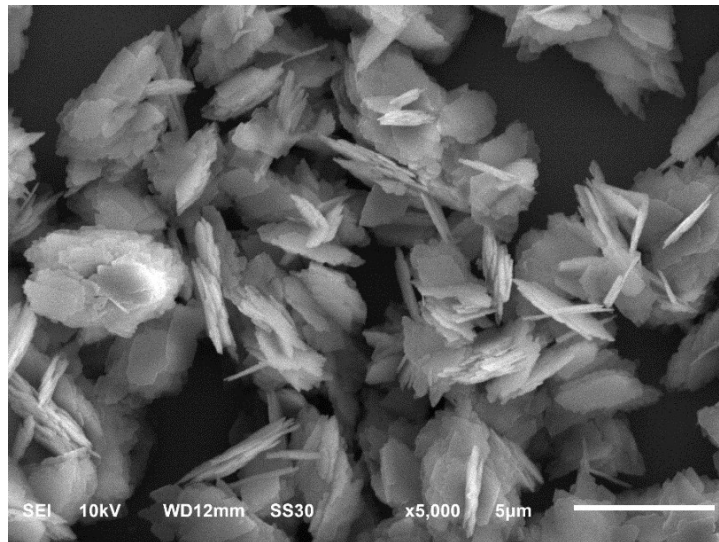

**Fig. S1** The scanning electron microscopy(SEM) image of clinoptilolite.

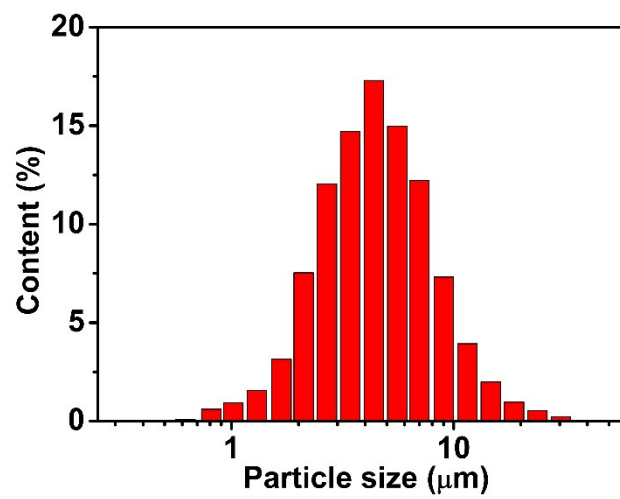

**Fig. S2** The particle size of clinoptilolite.

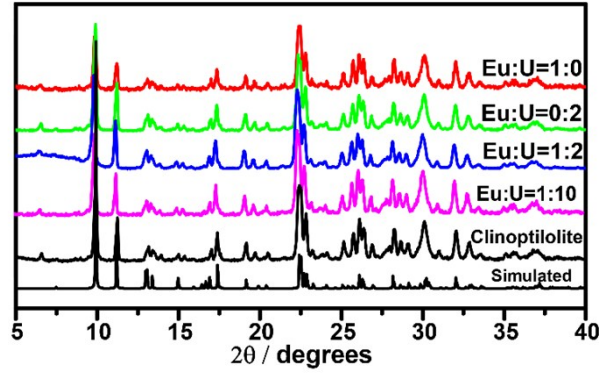

**Fig. S3** Powder X-ray diffraction of clinoptilolite before and after adsorption.

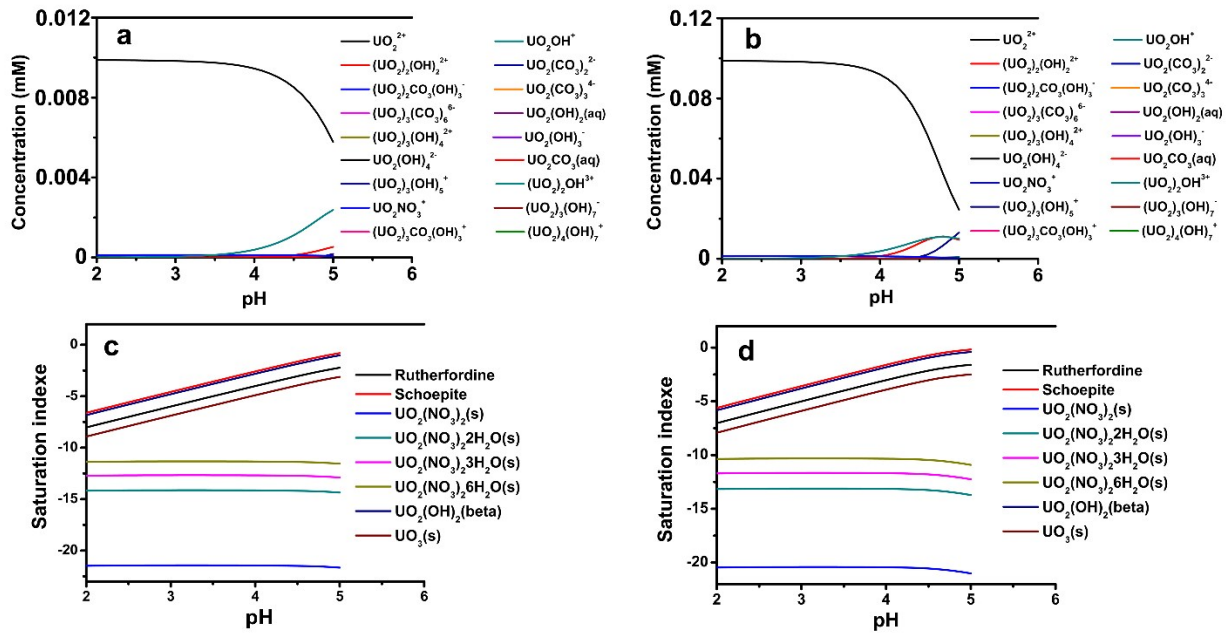

**Fig. S4** Hydrolysis species (a, b) and saturation index (c, d) of potential precipitate phase in 0.01 mM (a, c) and 0.1 mM (b, d)  $\text{UO}_2^{2+}$  systems. The data were exported from software chemical equilibrium model of Visual MINTEQ 3.1. The parameters were imported according to experimental systems, such as  $\text{Eu}^{3+}$  and  $\text{UO}_2^{2+}$  concentrations, pH value, temperature, atmospheric condition, etc.

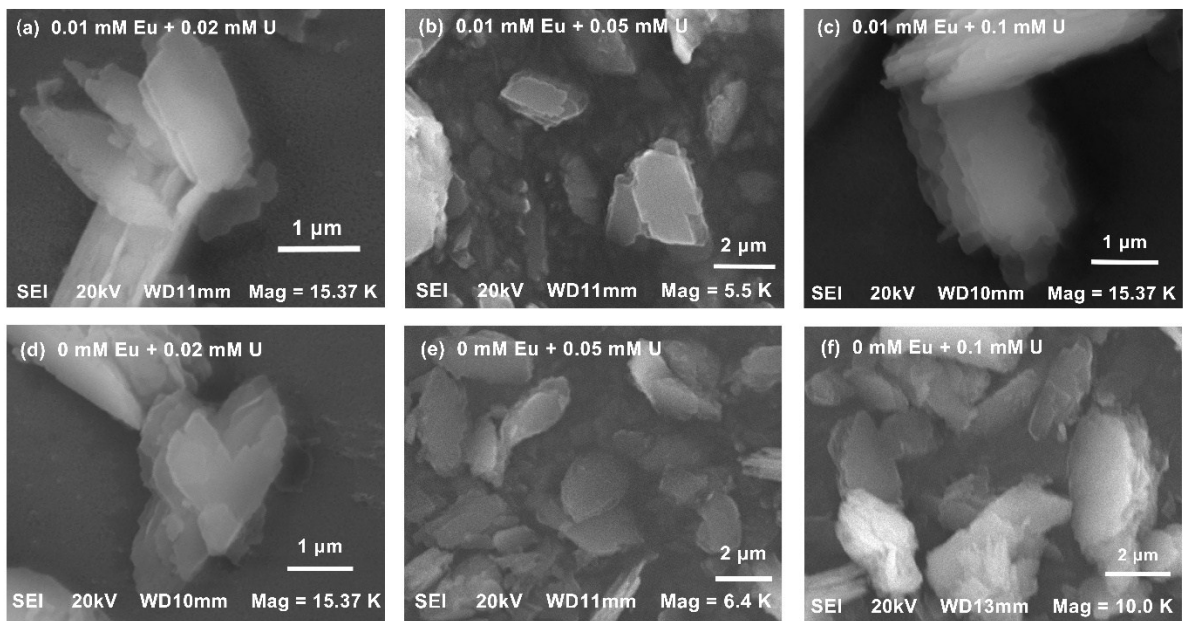

**Fig. S5** Scanning electron microscope (SEM) images of clinoptilolite after loading  $\text{UO}_2^{2+}$  and  $\text{Eu}^{3+}$ .
